# Supplementary material for: Dimerization of pentacyclopentacorannulene C30H10 as a strategy to produce C60H20 as a precursor for C60
Source: Royal Society of Chemistry journal article supplement (doi:10.1039/c9ra09804f), 2020-01-01
Supplement: c9ra09804f1.pdf [file c9ra09804f1.pdf]

## Supporting information

### Dimerization of pentacyclopentacorannulene C<sub>30</sub>H<sub>10</sub> as a strategy to produce C<sub>60</sub>H<sub>20</sub> as precursor for C<sub>60</sub>

Arlette Richaud,<sup>a,b,c</sup> María J. López,<sup>d</sup> Martha Mojica,<sup>a</sup> Julio A. Alonso<sup>d,e</sup> and Francisco Méndez\*<sup>a</sup>

*a. Departamento de Química, División de Ciencias Básicas e Ingeniería, Universidad Autónoma Metropolitana-Iztapalapa, A.P. 55-534, México D. F. 09340, México.*

*fm@xanum.uam.mx*

*b. Loire Valley Institute for Advanced Studies, Orléans & Tours, France.*

*c. Conditions extrêmes et Matériaux : Haute Température et Irradiation (CEMHTI), UPR 3079 CNRS, CEMHTI I, avenue de la Recherche Scientifique, 45071 Orléans, France*

*d. Departamento de Física Teórica, Atómica y Óptica, Universidad de Valladolid, 47011 Valladolid, Spain*

*e. Donostia International Physics Center, 20018 San Sebastián, Spain*

**Content:** Coordinates of all structures of C<sub>60</sub>H<sub>20</sub> plotted on Figs. 3 and 4

Fig. 3 a)

80

frame 1

|   |             |             |             |
|---|-------------|-------------|-------------|
| H | -2.21433303 | 4.00755012  | -1.66555100 |
| H | 0.34548698  | 4.56590285  | -1.66601925 |
| H | -4.22996914 | 1.73908049  | -1.66514650 |
| H | -4.49639099 | -0.86713205 | -1.66430000 |
| H | -2.96127777 | -3.48851090 | -1.66393975 |
| H | -0.56241929 | -4.54304531 | -1.66468250 |
| H | 2.40484016  | -3.89756939 | -1.66546375 |
| H | 4.14790242  | -1.94187383 | -1.66501525 |
| H | 4.44658202  | 1.08272686  | -1.66483275 |
| H | 3.12665749  | 3.34496442  | -1.66530525 |
| H | 0.56414580  | 4.54372845  | 1.66555100  |
| H | 2.96327520  | 3.49082085  | 1.66601925  |
| H | -2.39991105 | 3.89325915  | 1.66514650  |
| H | -4.14734415 | 1.94138775  | 1.66430000  |
| H | -4.44621930 | -1.08166920 | 1.66393975  |
| H | -3.12534180 | -3.34481910 | 1.66468250  |
| H | -0.34537725 | -4.56672945 | 1.66546375  |
| H | 2.21431875  | -4.00908480 | 1.66501525  |
| H | 4.23377130  | -1.73769090 | 1.66483275  |
| H | 4.49563980  | 0.86832990  | 1.66530525  |
| C | 1.05118586  | 0.61554807  | -4.77178650 |
| C | -0.26266211 | 1.19052232  | -4.77504900 |
| C | -1.21623556 | 0.11959919  | -4.77485400 |
| C | -0.48918976 | -1.11669512 | -4.77140425 |
| C | 0.91142235  | -0.81219479 | -4.77482700 |
| C | -0.50421319 | 2.30809907  | -4.00659275 |

|   |             |             |             |
|---|-------------|-------------|-------------|
| C | -1.75596884 | 2.50520734  | -3.30265450 |
| C | -2.69005354 | 1.45502252  | -3.30359600 |
| C | -2.35618372 | 0.23325920  | -4.00975950 |
| C | -2.92940194 | -0.89730168 | -3.30419250 |
| C | -2.21694344 | -2.10892018 | -3.30288225 |
| C | -0.95021198 | -2.16606363 | -4.00717725 |
| C | -0.05151863 | -3.06144335 | -3.30341550 |
| C | 1.32194753  | -2.76283262 | -3.30377550 |
| C | 1.76513436  | -1.57374439 | -4.00652175 |
| C | 2.89591243  | -0.99603548 | -3.30249700 |
| C | 3.03296793  | 0.40317820  | -3.30208225 |
| C | 2.03911510  | 1.19219218  | -4.00497975 |
| C | 0.55374304  | 3.00925680  | -3.30308925 |
| C | 1.84098167  | 2.44585057  | -3.30327475 |
| C | -1.48306338 | 3.57248641  | -2.34477475 |
| C | -0.13856351 | 3.86579601  | -2.34505475 |
| C | -3.71483546 | 1.06142561  | -2.34405500 |
| C | -3.85575156 | -0.30766357 | -2.34412750 |
| C | -2.15856470 | -3.20714388 | -2.34332850 |
| C | -0.89822051 | -3.76090279 | -2.34371275 |
| C | 2.38524124  | -3.04810361 | -2.34597550 |
| C | 3.30134926  | -2.02051268 | -2.34532000 |
| C | 3.63156766  | 1.32682505  | -2.34421800 |
| C | 2.93939238  | 2.51531866  | -2.34498675 |
| C | 1.21223730  | -0.11988270 | 4.77178650  |
| C | 0.48727335  | 1.11754170  | 4.77504900  |
| C | -0.91365660 | 0.81164310  | 4.77485400  |
| C | -1.05213975 | -0.61588680 | 4.77140425  |
| C | 0.25996005  | -1.19280000 | 4.77482700  |
| C | 0.94874955  | 2.16366045  | 4.00659275  |
| C | 0.05191530  | 3.05888790  | 3.30265450  |
| C | -1.32105825 | 2.75831175  | 3.30359600  |
| C | -1.76908635 | 1.57364070  | 4.00975950  |
| C | -2.89735665 | 0.99592695  | 3.30419250  |
| C | -3.03313710 | -0.40306560 | 3.30288225  |
| C | -2.04191790 | -1.19386170 | 4.00717725  |
| C | -1.84115070 | -2.44647780 | 3.30341550  |
| C | -0.55447425 | -3.01219980 | 3.30377550  |
| C | 0.50299995  | -2.31070590 | 4.00652175  |
| C | 1.75738740  | -2.50798425 | 3.30249700  |
| C | 2.69070480  | -1.45655580 | 3.30208225  |
| C | 2.35043175  | -0.23405805 | 4.00497975  |
| C | 2.21678430  | 2.10905790  | 3.30308925  |
| C | 2.92702035  | 0.89663280  | 3.30327475  |
| C | 0.90003135  | 3.76192500  | 2.34477475  |
| C | 2.16015765  | 3.20894025  | 2.34505475  |
| C | -2.38147470 | 3.04223685  | 2.34405500  |
| C | -3.30020865 | 2.01744885  | 2.34412750  |
| C | -3.63142740 | -1.32586140 | 2.34332850  |
| C | -2.93727885 | -2.51467350 | 2.34371275  |
| C | 0.13807035  | -3.86797725 | 2.34597550  |

|   |            |             |            |
|---|------------|-------------|------------|
| C | 1.48322010 | -3.57511350 | 2.34532000 |
| C | 3.71788815 | -1.06115790 | 2.34421800 |
| C | 3.85648560 | 0.30720405  | 2.34498675 |

Fig. 3 b)

80

frame 1

|   |             |             |             |
|---|-------------|-------------|-------------|
| H | -2.26835040 | 4.25079210  | -1.01593875 |
| H | 0.28385220  | 4.80415920  | -1.00660350 |
| H | -4.49735175 | 1.74907470  | -1.01753675 |
| H | -4.75209855 | -0.84985860 | -1.01219125 |
| H | -3.06203355 | -3.72284835 | -0.99989450 |
| H | -0.66991605 | -4.77454050 | -0.98928200 |
| H | 2.59323630  | -4.07369160 | -0.98905200 |
| H | 4.33365135  | -2.12581035 | -0.98603100 |
| H | 4.67233590  | 1.20215460  | -0.99541950 |
| H | 3.34841940  | 3.45510930  | -0.99630575 |
| H | 0.68584065  | 4.77254925  | 0.98700275  |
| H | 3.07732830  | 3.72261510  | 1.00133025  |
| H | -2.59488450 | 4.06728495  | 0.98906925  |
| H | -4.33543320 | 2.11966875  | 0.99604225  |
| H | -4.66670670 | -1.20430170 | 1.00122775  |
| H | -3.34000200 | -3.45466920 | 0.99641825  |
| H | -0.27756600 | -4.80330870 | 1.00500250  |
| H | 2.27488905  | -4.25311965 | 1.02069800  |
| H | 4.49662515  | -1.76475840 | 1.02423825  |
| H | 4.75595160  | 0.83409660  | 1.01282650  |
| C | 1.05395595  | 0.59793225  | -3.77451325 |
| C | -0.24902610 | 1.16063955  | -3.75004900 |
| C | -1.19115045 | 0.10301055  | -3.74985400 |
| C | -0.47594025 | -1.12206525 | -3.77664825 |
| C | 0.91142235  | -0.81219480 | -3.74982700 |
| C | -0.49540695 | 2.28151680  | -3.02262325 |
| C | -1.77734895 | 2.51878845  | -2.39102075 |
| C | -2.72293410 | 1.46332110  | -2.39775525 |
| C | -2.34018255 | 0.21886905  | -3.03322200 |
| C | -2.96011230 | -0.92253015 | -2.39804825 |
| C | -2.24287095 | -2.14425330 | -2.40038875 |
| C | -0.94252350 | -2.17068120 | -3.04174775 |
| C | -0.04847940 | -3.10705005 | -2.39064625 |
| C | 1.33573050  | -2.80509255 | -2.38354825 |
| C | 1.76698215  | -1.58010315 | -3.02514450 |
| C | 2.93493645  | -1.01717370 | -2.38279175 |
| C | 3.08058300  | 0.39311745  | -2.39211175 |
| C | 2.04580635  | 1.17707955  | -3.03987375 |
| C | 0.56709975  | 3.02641590  | -2.38402825 |
| C | 1.86749130  | 2.46135015  | -2.39127850 |
| C | -1.51712700 | 3.69537885  | -1.57019675 |
| C | -0.16613265 | 3.98808480  | -1.56461450 |
| C | -3.86559900 | 1.06807785  | -1.58079575 |
| C | -4.00002735 | -0.30737265 | -1.57796975 |

|   |             |             |             |
|---|-------------|-------------|-------------|
| C | -2.21781960 | -3.33967845 | -1.56530725 |
| C | -0.95272380 | -3.89479800 | -1.55934225 |
| C | 2.48495280  | -3.15142155 | -1.55243900 |
| C | 3.40615275  | -2.12100015 | -1.55138800 |
| C | 3.76438815  | 1.38239925  | -1.56326500 |
| C | 3.06342420  | 2.57304150  | -1.56196700 |
| C | 1.20708165  | -0.10899285 | 3.78186975  |
| C | 0.48495675  | 1.11308340  | 3.75004900  |
| C | -0.90057030 | 0.81319350  | 3.74985400  |
| C | -1.04584830 | -0.59856465 | 3.77595025  |
| C | 0.25648290  | -1.16195400 | 3.74982700  |
| C | 0.95076795  | 2.16113160  | 3.02218075  |
| C | 0.05683725  | 3.09861120  | 2.37600125  |
| C | -1.32967800 | 2.80059225  | 2.37782275  |
| C | -1.75919955 | 1.57825170  | 3.02491275  |
| C | -2.93107845 | 1.01446170  | 2.38938325  |
| C | -3.07587705 | -0.39579315 | 2.39938125  |
| C | -2.03921925 | -1.17866985 | 3.04449125  |
| C | -1.86145800 | -2.46277320 | 2.39462150  |
| C | -0.56124675 | -3.02783940 | 2.38554950  |
| C | 0.50127420  | -2.28498660 | 3.02641250  |
| C | 1.78349355  | -2.52426645 | 2.39923025  |
| C | 2.73092385  | -1.47188340 | 2.41219675  |
| C | 2.35267155  | -0.22700700 | 3.05352275  |
| C | 2.25376635  | 2.13425445  | 2.39104725  |
| C | 2.97098295  | 0.91210155  | 2.40509350  |
| C | 0.96454875  | 3.88709565  | 1.55035225  |
| C | 2.23080390  | 3.33171120  | 1.55785200  |
| C | -2.48328390 | 3.14559630  | 1.55230575  |
| C | -3.40509150 | 2.11522995  | 1.55646250  |
| C | -3.76067175 | -1.38499065 | 1.57121700  |
| C | -3.05717565 | -2.57474970 | 1.56625625  |
| C | 0.17208255  | -3.98966145 | 1.56649475  |
| C | 1.52355030  | -3.69809115 | 1.57437475  |
| C | 3.87093255  | -1.08170130 | 1.59084600  |
| C | 4.00895250  | 0.29326470  | 1.58577075  |

Fig. 3 c)

80

frame 1

|   |             |             |             |
|---|-------------|-------------|-------------|
| H | -2.46985632 | 4.22781410  | -0.99401148 |
| H | -0.06948577 | 4.90108192  | -0.98913652 |
| H | -4.67754597 | 1.46720710  | -0.98177829 |
| H | -4.76111580 | -1.07443618 | -0.94679944 |
| H | -2.86400106 | -3.95161368 | -0.93545751 |
| H | -0.44737748 | -4.85629036 | -0.93474104 |
| H | 2.88366067  | -3.91979872 | -0.94100138 |
| H | 4.47707592  | -1.94684761 | -0.96308875 |
| H | 4.63199065  | 1.57744875  | -0.97326501 |
| H | 3.24692156  | 3.67507788  | -0.98235816 |
| H | 0.48274580  | 4.88299607  | 0.97606288  |

|   |             |             |             |
|---|-------------|-------------|-------------|
| H | 2.82747910  | 4.00987820  | 0.97290919  |
| H | -2.92790737 | 3.92880811  | 0.97696205  |
| H | -4.48086533 | 1.96307870  | 0.96718370  |
| H | -4.65183295 | -1.53100761 | 0.96323843  |
| H | -3.21039628 | -3.66428588 | 0.94365387  |
| H | 0.01010885  | -4.86230795 | 0.95121239  |
| H | 2.48518891  | -4.19285613 | 0.97784515  |
| H | 4.65929575  | -1.45276945 | 0.98166547  |
| H | 4.77327096  | 1.06358073  | 0.97593250  |
| C | 1.02312977  | 0.70165711  | -3.55877267 |
| C | -0.32508484 | 1.20701786  | -3.56056537 |
| C | -1.21755437 | 0.08262807  | -3.56055416 |
| C | -0.42280459 | -1.11421366 | -3.55858852 |
| C | 0.96101887  | -0.73332890 | -3.55511339 |
| C | -0.63237373 | 2.28967424  | -2.72533582 |
| C | -1.86683842 | 2.37967888  | -1.98932923 |
| C | -2.73466581 | 1.29861668  | -2.01193977 |
| C | -2.34126347 | 0.12198367  | -2.74068494 |
| C | -2.84565743 | -1.03274804 | -2.03335892 |
| C | -2.08180160 | -2.20956924 | -2.06437642 |
| C | -0.81970167 | -2.17361151 | -2.76420970 |
| C | 0.10906887  | -3.02363214 | -2.05949997 |
| C | 1.45556342  | -2.63627555 | -2.02060275 |
| C | 1.83406684  | -1.43568956 | -2.72888242 |
| C | 2.90711040  | -0.80454160 | -2.00341584 |
| C | 2.96496192  | 0.58557701  | -1.99752456 |
| C | 1.96454667  | 1.32137202  | -2.73148784 |
| C | 0.37657778  | 3.01085210  | -1.98984157 |
| C | 1.67818275  | 2.53065601  | -1.99873628 |
| C | -1.73837409 | 3.41734858  | -0.92425923 |
| C | -0.27370841 | 3.82910510  | -0.92411592 |
| C | -3.74857171 | 0.90461998  | -1.01479350 |
| C | -3.82152960 | -0.55242486 | -1.07537974 |
| C | -2.00850289 | -3.33060060 | -1.15758219 |
| C | -0.68119502 | -3.82394685 | -1.14859431 |
| C | 2.50122180  | -2.91160529 | -1.04641986 |
| C | 3.40698361  | -1.76410373 | -1.00551976 |
| C | 3.54870761  | 1.47383402  | -0.96810074 |
| C | 2.71914927  | 2.72197831  | -0.95466975 |
| C | 1.22437974  | -0.01367665 | 3.56247570  |
| C | 0.43070096  | 1.18553247  | 3.55529722  |
| C | -0.95504381 | 0.80321153  | 3.55677261  |
| C | -1.01611353 | -0.63162097 | 3.56819747  |
| C | 0.33021551  | -1.13510116 | 3.56959587  |
| C | 0.82736448  | 2.23808328  | 2.72206903  |
| C | -0.11535782 | 3.03199355  | 1.97797012  |
| C | -1.44923035 | 2.66032133  | 1.97643025  |
| C | -1.83979619 | 1.49289236  | 2.71992314  |
| C | -2.91093715 | 0.84192166  | 2.00412275  |
| C | -2.98895861 | -0.55183069 | 2.05726360  |
| C | -1.95672257 | -1.26232746 | 2.77181030  |

|   |             |             |            |
|---|-------------|-------------|------------|
| C | -1.69894213 | -2.50386867 | 2.07622402 |
| C | -0.38046295 | -2.99364931 | 2.07027190 |
| C | 0.62767395  | -2.22592228 | 2.76707820 |
| C | 1.87070466  | -2.35892765 | 2.05122907 |
| C | 2.73300298  | -1.26363905 | 2.01943790 |
| C | 2.34774464  | -0.07378368 | 2.73555745 |
| C | 2.06875080  | 2.22680584  | 1.98835205 |
| C | 2.83276301  | 1.06648152  | 1.99867889 |
| C | 0.60282365  | 3.79833683  | 0.91798172 |
| C | 2.02116377  | 3.27563680  | 0.93592913 |
| C | -2.46586060 | 2.93938348  | 0.92082839 |
| C | -3.40934264 | 1.76830208  | 0.97169468 |
| C | -3.58404817 | -1.50224159 | 1.12939724 |
| C | -2.80051390 | -2.68951519 | 1.16151378 |
| C | 0.32488565  | -3.84679947 | 1.14281890 |
| C | 1.70275863  | -3.45647675 | 1.10520600 |
| C | 3.72998133  | -0.88910635 | 1.00475608 |
| C | 3.79103439  | 0.59465319  | 0.97638553 |

Fig. 3 d)

80

frame 1

|   |             |             |             |
|---|-------------|-------------|-------------|
| H | -2.39835116 | 4.22720500  | -1.01536864 |
| H | -0.10339223 | 4.85968836  | -1.01165001 |
| H | -4.65063406 | 1.41498705  | -1.01702887 |
| H | -4.75226112 | -0.99805364 | -0.99517428 |
| H | -2.82163756 | -3.96647457 | -0.99898021 |
| H | -0.51570772 | -4.83510281 | -0.99664942 |
| H | 2.90215809  | -3.86853583 | -0.98642463 |
| H | 4.41330430  | -1.99504519 | -1.00115057 |
| H | 4.57634767  | 1.60028776  | -1.00483769 |
| H | 3.26971850  | 3.59736950  | -1.00999896 |
| H | 0.54143207  | 4.83512755  | 0.99675386  |
| H | 2.77258051  | 3.99798694  | 0.99954884  |
| H | -2.93412761 | 3.87495793  | 0.99897428  |
| H | -4.42145241 | 2.00817726  | 0.99849918  |
| H | -4.60770390 | -1.56103436 | 1.02221287  |
| H | -3.25586179 | -3.60562134 | 1.00665138  |
| H | 0.05570464  | -4.84571625 | 1.01119712  |
| H | 2.40780955  | -4.20160644 | 1.02795200  |
| H | 4.63456137  | -1.40026059 | 1.01389174  |
| H | 4.74893158  | 0.98894372  | 1.00596842  |
| C | 1.03238976  | 0.70243315  | -3.52975302 |
| C | -0.32603001 | 1.21457013  | -3.53126292 |
| C | -1.23015578 | 0.08151088  | -3.53529206 |
| C | -0.43193718 | -1.12762880 | -3.54008526 |
| C | 0.96561084  | -0.74615800 | -3.53017318 |
| C | -0.63342271 | 2.31456638  | -2.68150990 |
| C | -1.84821087 | 2.36636312  | -1.90781884 |
| C | -2.70816496 | 1.29315735  | -1.91684110 |
| C | -2.37610098 | 0.12478090  | -2.69229479 |

|   |             |             |             |
|---|-------------|-------------|-------------|
| C | -2.82017826 | -1.02100163 | -1.93545010 |
| C | -2.06868223 | -2.17718159 | -1.95840102 |
| C | -0.84164982 | -2.21102803 | -2.71881759 |
| C | 0.10114644  | -2.99414691 | -1.95401596 |
| C | 1.42735683  | -2.61730272 | -1.92335616 |
| C | 1.85562565  | -1.46734855 | -2.68243340 |
| C | 2.87417331  | -0.80629978 | -1.90672090 |
| C | 2.93496150  | 0.56800054  | -1.90470119 |
| C | 1.98825382  | 1.32887546  | -2.68154314 |
| C | 0.38123239  | 2.98510412  | -1.90765674 |
| C | 1.66911784  | 2.50325079  | -1.90909212 |
| C | -1.75465797 | 3.36814255  | -0.74301795 |
| C | -0.21294731 | 3.79134674  | -0.74157587 |
| C | -3.66967337 | 0.96738522  | -0.76068980 |
| C | -3.73843146 | -0.62024387 | -0.76772327 |
| C | -2.05282490 | -3.19665817 | -0.81536404 |
| C | -0.58325230 | -3.74938618 | -0.81034458 |
| C | 2.38088577  | -2.92140230 | -0.75149846 |
| C | 3.38178261  | -1.68186530 | -0.74598499 |
| C | 3.52298390  | 1.38377680  | -0.74049205 |
| C | 2.65035587  | 2.71925281  | -0.74258747 |
| C | 1.23669451  | -0.01970916 | 3.53522492  |
| C | 0.44017362  | 1.19256485  | 3.52627644  |
| C | -0.95964079 | 0.81008603  | 3.52995179  |
| C | -1.02567139 | -0.63815324 | 3.54809780  |
| C | 0.33068687  | -1.14937528 | 3.54800525  |
| C | 0.84370754  | 2.25650934  | 2.67318881  |
| C | -0.10549868 | 3.00972688  | 1.89380679  |
| C | -1.43113033 | 2.64499317  | 1.89394303  |
| C | -1.85782505 | 1.51366327  | 2.67675508  |
| C | -2.88040970 | 0.83958032  | 1.91561575  |
| C | -2.94922582 | -0.53546332 | 1.94716943  |
| C | -1.98769508 | -1.28048100 | 2.72295298  |
| C | -1.68169891 | -2.47361563 | 1.96945945  |
| C | -0.38831350 | -2.95776593 | 1.96520362  |
| C | 0.63093956  | -2.26538490 | 2.71947112  |
| C | 1.84625321  | -2.33962343 | 1.94610262  |
| C | 2.70323100  | -1.26239682 | 1.92390947  |
| C | 2.37818737  | -0.08377885 | 2.68688125  |
| C | 2.05846111  | 2.19680839  | 1.90022614  |
| C | 2.81169820  | 1.04712072  | 1.90669441  |
| C | 0.55938921  | 3.76071426  | 0.72987142  |
| C | 2.05291176  | 3.20012835  | 0.73219521  |
| C | -2.39602042 | 2.94376859  | 0.73158297  |
| C | -3.39156973 | 1.69496367  | 0.73954289  |
| C | -3.53969013 | -1.37429162 | 0.80414304  |
| C | -2.67223246 | -2.68896010 | 0.81912099  |
| C | 0.21182626  | -3.77186045 | 0.81077862  |
| C | 1.73527601  | -3.35376174 | 0.79664329  |
| C | 3.65470929  | -0.95421258 | 0.75206050  |
| C | 3.73150253  | 0.63928952  | 0.74413995  |

Fig. 3 e)

80

frame 72

|   |           |           |           |
|---|-----------|-----------|-----------|
| H | -2.542433 | 4.216431  | -1.028246 |
| H | -0.429600 | 4.902193  | -1.035513 |
| H | -4.782054 | 1.132850  | -1.011745 |
| H | -4.779193 | -1.087147 | -1.005910 |
| H | -2.545085 | -4.171473 | -1.001605 |
| H | -0.431939 | -4.863298 | -1.004526 |
| H | 3.191799  | -3.680686 | -1.014908 |
| H | 4.496104  | -1.884773 | -1.028900 |
| H | 4.500705  | 1.927724  | -1.038896 |
| H | 3.196555  | 3.727677  | -1.041297 |
| H | 0.410750  | 4.907807  | 1.000977  |
| H | 2.521195  | 4.224581  | 0.999822  |
| H | -3.209527 | 3.730338  | 1.018119  |
| H | -4.516503 | 1.935805  | 1.026126  |
| H | -4.515840 | -1.873622 | 1.037200  |
| H | -3.215723 | -3.671856 | 1.041397  |
| H | 0.409424  | -4.852515 | 1.036599  |
| H | 2.522651  | -4.168461 | 1.029413  |
| H | 4.765308  | -1.082398 | 1.011668  |
| H | 4.764072  | 1.137866  | 1.004196  |
| C | 0.969012  | 0.731085  | -3.274740 |
| C | -0.393750 | 1.174027  | -3.272273 |
| C | -1.235605 | 0.013740  | -3.267267 |
| C | -0.394189 | -1.146410 | -3.265813 |
| C | 0.968402  | -0.702791 | -3.269773 |
| C | -0.743200 | 2.262117  | -2.465765 |
| C | -1.967206 | 2.290074  | -1.735503 |
| C | -2.774634 | 1.180106  | -1.730231 |
| C | -2.374108 | 0.017009  | -2.454520 |
| C | -2.772505 | -1.138764 | -1.720575 |
| C | -1.967847 | -2.249857 | -1.720357 |
| C | -0.745087 | -2.230336 | -2.453124 |
| C | 0.233614  | -2.968459 | -1.724659 |
| C | 1.538470  | -2.543659 | -1.727748 |
| C | 1.892653  | -1.371226 | -2.459902 |
| C | 2.896725  | -0.666687 | -1.733090 |
| C | 2.900873  | 0.706248  | -1.740070 |
| C | 1.893746  | 1.405174  | -2.468856 |
| C | 0.235798  | 3.004469  | -1.742052 |
| C | 1.540901  | 2.580868  | -1.743602 |
| C | -1.942232 | 3.364298  | -0.677752 |
| C | -0.410689 | 3.858144  | -0.682900 |
| C | -3.780266 | 0.830537  | -0.665384 |
| C | -3.780406 | -0.778997 | -0.659278 |
| C | -1.944027 | -3.316805 | -0.656041 |
| C | -0.412072 | -3.817093 | -0.658684 |
| C | 2.562971  | -2.845775 | -0.667299 |



|   |           |           |           |
|---|-----------|-----------|-----------|
| C | 3.510137  | -1.544108 | -0.673459 |
| C | 3.515399  | 1.590449  | -0.684929 |
| C | 2.567345  | 2.894921  | -0.687639 |
| C | 1.219408  | 0.034231  | 3.268557  |
| C | 0.377389  | 1.193814  | 3.264676  |
| C | -0.985757 | 0.751874  | 3.270682  |
| C | -0.986791 | -0.680859 | 3.275530  |
| C | 0.376156  | -1.124593 | 3.273553  |
| C | 0.729419  | 2.277798  | 2.451961  |
| C | -0.250448 | 3.016274  | 1.723449  |
| C | -1.555027 | 2.591271  | 1.727033  |
| C | -1.909727 | 1.420838  | 2.460511  |
| C | -2.917718 | 0.719013  | 1.736964  |
| C | -2.918385 | -0.653544 | 1.741918  |
| C | -1.911760 | -1.354019 | 2.469991  |
| C | -1.559130 | -2.530776 | 1.744409  |
| C | -0.254809 | -2.956477 | 1.742472  |
| C | 0.724692  | -2.212802 | 2.466023  |
| C | 1.949584  | -2.238356 | 1.734559  |
| C | 2.757614  | -1.127788 | 1.729235  |
| C | 2.357929  | 0.031651  | 2.455586  |
| C | 1.953374  | 2.300116  | 1.719812  |
| C | 2.758506  | 1.187762  | 1.721169  |
| C | 0.391443  | 3.860846  | 0.656564  |
| C | 1.923898  | 3.366646  | 0.654797  |
| C | -2.582674 | 2.895940  | 0.667720  |
| C | -3.530504 | 1.594669  | 0.674194  |
| C | -3.530385 | -1.535128 | 0.684709  |
| C | -2.586028 | -2.840446 | 0.686957  |
| C | 0.390511  | -3.811654 | 0.682914  |
| C | 1.921315  | -3.313369 | 0.678390  |
| C | 3.764611  | -0.778345 | 0.664504  |
| C | 3.764319  | 0.832495  | 0.658413  |

Fig. 4 a)

80

frame 1

|   |             |             |             |
|---|-------------|-------------|-------------|
| H | -2.24442540 | 4.01600880  | -0.80239150 |
| H | 0.31457385  | 4.55372175  | -0.70335925 |
| H | -4.52943900 | 1.77906060  | -1.19314800 |
| H | -4.82548800 | -0.82563975 | -1.25432025 |
| H | -3.04834830 | -3.51497415 | -0.87621650 |
| H | -0.64675020 | -4.55086845 | -0.75600825 |
| H | 2.39897355  | -3.91916220 | -0.67997400 |
| H | 4.16227620  | -1.98436785 | -0.66269350 |
| H | 4.49465610  | 1.09041975  | -0.66851550 |
| H | 3.17002020  | 3.34706565  | -0.68197025 |
| H | -1.79915580 | 4.54898400  | 4.93589375  |
| H | -0.58440105 | 3.49489860  | 7.00039050  |
| H | -3.41336355 | 3.93052035  | 2.33506200  |
| H | -4.31897595 | 1.98187470  | 0.84697000  |

|   |             |             |             |
|---|-------------|-------------|-------------|
| H | -4.51645245 | -1.13247510 | 0.58443850  |
| H | -3.85863420 | -3.40213335 | 1.70386150  |
| H | -2.28300810 | -4.56737775 | 4.09415650  |
| H | -0.97077255 | -4.02295830 | 6.29367100  |
| H | 0.05427705  | -1.77308100 | 8.09741450  |
| H | 0.19742475  | 0.82881405  | 8.32243100  |
| C | 1.12285365  | 0.60850440  | -3.79534875 |
| C | -0.18415290 | 1.18949175  | -3.82824075 |
| C | -1.13514030 | 0.12428265  | -3.86361850 |
| C | -0.42471750 | -1.11435630 | -3.83444300 |
| C | 0.97345485  | -0.81721680 | -3.79872700 |
| C | -0.45607875 | 2.29994100  | -3.06414550 |
| C | -1.74298530 | 2.50832175  | -2.42479425 |
| C | -2.70087795 | 1.47524160  | -2.50364050 |
| C | -2.30566500 | 0.24523440  | -3.16174600 |
| C | -2.94956325 | -0.88560765 | -2.52687375 |
| C | -2.22722295 | -2.09448255 | -2.45055175 |
| C | -0.91899585 | -2.14746090 | -3.07538475 |
| C | -0.04953750 | -3.04356915 | -2.34161450 |
| C | 1.32894165  | -2.76042870 | -2.31279750 |
| C | 1.80099240  | -1.57975515 | -3.01056975 |
| C | 2.92842765  | -1.01039100 | -2.29684600 |
| C | 3.07831455  | 0.39035430  | -2.29723050 |
| C | 2.09004090  | 1.18237110  | -3.00673725 |
| C | 0.58203810  | 2.99844840  | -2.33170725 |
| C | 1.87548090  | 2.43742605  | -2.30924700 |
| C | -1.49419890 | 3.57417540  | -1.45676075 |
| C | -0.14552175 | 3.85625835  | -1.40158175 |
| C | -3.87215985 | 1.09091385  | -1.72121850 |
| C | -4.02174240 | -0.27921345 | -1.74241250 |
| C | -2.20953555 | -3.20632125 | -1.49899800 |
| C | -0.94567530 | -3.75228375 | -1.43334850 |
| C | 2.38463790  | -3.06208800 | -1.35169225 |
| C | 3.31335600  | -2.04514485 | -1.34195600 |
| C | 3.67480725  | 1.32357975  | -1.34576175 |
| C | 2.97714975  | 2.51209710  | -1.35355975 |
| C | -4.13928165 | -0.13480065 | 7.04598675  |
| C | -4.50192690 | 1.10531985  | 6.42728775  |
| C | -5.21984295 | 0.80327775  | 5.22638750  |
| C | -5.30103660 | -0.62047710 | 5.10604125  |
| C | -4.62837330 | -1.20177825 | 6.22674725  |
| C | -3.60296820 | 2.14617375  | 6.42882300  |
| C | -3.46025835 | 3.04486980  | 5.29970725  |
| C | -4.17508590 | 2.75349240  | 4.12148525  |
| C | -5.00098965 | 1.56205860  | 4.10054925  |
| C | -5.00920935 | 0.99188400  | 2.76759200  |
| C | -5.09746395 | -0.41060805 | 2.64875850  |
| C | -5.16953385 | -1.19786730 | 3.86663075  |
| C | -4.48481100 | -2.46140955 | 3.67202275  |
| C | -3.80257245 | -3.02116425 | 4.76703850  |
| C | -3.85231020 | -2.32213665 | 6.03723575  |

|   |             |             |            |
|---|-------------|-------------|------------|
| C | -2.60962905 | -2.52613710 | 6.75316250 |
| C | -2.13311310 | -1.48399875 | 7.56874175 |
| C | -2.90308755 | -0.25679490 | 7.63407475 |
| C | -2.35822755 | 2.09038725  | 7.17109900 |
| C | -2.00309310 | 0.87221295  | 7.77920725 |
| C | -2.21252340 | 3.75747570  | 5.55923025 |
| C | -1.57071090 | 3.20119890  | 6.64413950 |
| C | -3.95156550 | 3.06197520  | 2.71252800 |
| C | -4.43481795 | 2.03923035  | 1.92617200 |
| C | -4.64533125 | -1.35958245 | 1.63804175 |
| C | -4.28803470 | -2.54990100 | 2.23015650 |
| C | -2.62182270 | -3.87376425 | 4.86240975 |
| C | -1.93071105 | -3.58818720 | 6.01907525 |
| C | -0.78997680 | -1.09510770 | 7.98718250 |
| C | -0.71385225 | 0.27432555  | 8.10478775 |

Fig. 4 b)

80

frame 1

|   |             |             |             |
|---|-------------|-------------|-------------|
| H | -2.20805888 | 4.22516234  | -0.89549005 |
| H | 0.35410261  | 4.73205991  | -0.83455985 |
| H | -4.73665863 | 1.62649654  | -1.94060716 |
| H | -4.95935897 | -0.70870606 | -2.10282875 |
| H | -2.94918537 | -3.89946312 | -1.13090829 |
| H | -0.51147490 | -4.79845810 | -1.01169327 |
| H | 2.50812214  | -3.89907664 | -0.72677259 |
| H | 4.21935786  | -1.91887538 | -0.67566026 |
| H | 4.50966934  | 1.12959625  | -0.67325569 |
| H | 3.18432160  | 3.38774810  | -0.68252179 |
| H | -1.67647141 | 4.44481353  | 3.43718815  |
| H | -0.52081813 | 3.43837175  | 5.57381480  |
| H | -3.03573821 | 3.60323574  | 0.91867391  |
| H | -5.07739790 | 2.43987253  | -0.34435398 |
| H | -5.55000076 | -1.53664517 | -0.59807100 |
| H | -3.75585983 | -3.27338839 | 0.38118168  |
| H | -2.29535704 | -4.48382563 | 2.68271383  |
| H | -0.98325694 | -3.95704816 | 4.89583718  |
| H | 0.03646374  | -1.76553168 | 6.70008951  |
| H | 0.19657086  | 0.84691956  | 6.93473821  |
| C | 1.12678055  | 0.64158613  | -3.78052327 |
| C | -0.19042662 | 1.19447984  | -3.75503792 |
| C | -1.11600601 | 0.11389274  | -3.74178182 |
| C | -0.38871583 | -1.10657095 | -3.78588093 |
| C | 1.00385005  | -0.78409313 | -3.79282818 |
| C | -0.45164484 | 2.29602917  | -2.98225958 |
| C | -1.71467026 | 2.50773644  | -2.30590972 |
| C | -2.61429116 | 1.42267647  | -2.26862410 |
| C | -2.21763718 | 0.19591014  | -2.92202597 |
| C | -2.83420097 | -0.96223793 | -2.32093871 |
| C | -2.14100287 | -2.18297458 | -2.39872657 |
| C | -0.84395432 | -2.16692118 | -3.04805387 |

|   |             |             |             |
|---|-------------|-------------|-------------|
| C | 0.05586774  | -3.09193734 | -2.39455301 |
| C | 1.42104245  | -2.75375477 | -2.35454568 |
| C | 1.85721500  | -1.54444122 | -3.02788542 |
| C | 2.97303009  | -0.96188923 | -2.31386039 |
| C | 3.10264451  | 0.43976453  | -2.30968737 |
| C | 2.10470556  | 1.22346905  | -3.00856321 |
| C | 0.60052945  | 3.03274680  | -2.31605965 |
| C | 1.89361225  | 2.47599237  | -2.31101861 |
| C | -1.45792280 | 3.67223777  | -1.45607610 |
| C | -0.11014527 | 3.95883471  | -1.44344278 |
| C | -3.87687450 | 1.05168514  | -1.60454932 |
| C | -4.02936529 | -0.38677549 | -1.63820549 |
| C | -2.10231191 | -3.42096250 | -1.61326955 |
| C | -0.82243302 | -3.92495617 | -1.58105925 |
| C | 2.48015898  | -3.03668739 | -1.39103182 |
| C | 3.38275287  | -1.99675316 | -1.36738960 |
| C | 3.69507183  | 1.36985623  | -1.35451485 |
| C | 2.99798638  | 2.55611629  | -1.35926902 |
| C | -4.15984155 | -0.09106388 | 5.65409575  |
| C | -4.49553844 | 1.13564949  | 5.01168697  |
| C | -5.25676478 | 0.84605189  | 3.82629799  |
| C | -5.36591172 | -0.57267468 | 3.71983064  |
| C | -4.65597118 | -1.14589891 | 4.83419513  |
| C | -3.57080145 | 2.16049559  | 4.99908678  |
| C | -3.36809460 | 3.00755892  | 3.85029952  |
| C | -4.04493424 | 2.65589407  | 2.65860958  |
| C | -5.01082735 | 1.57092476  | 2.68346657  |
| C | -5.12402134 | 1.00431922  | 1.35896037  |
| C | -5.24333156 | -0.37922334 | 1.25368562  |
| C | -5.23283275 | -1.14716973 | 2.47753119  |
| C | -4.47013536 | -2.36812807 | 2.26915314  |
| C | -3.80862187 | -2.95892009 | 3.37851302  |
| C | -3.87347450 | -2.26726817 | 4.64087642  |
| C | -2.63069363 | -2.47565595 | 5.36298774  |
| C | -2.15826381 | -1.44099009 | 6.18899591  |
| C | -2.92421795 | -0.22198958 | 6.27431610  |
| C | -2.33660043 | 2.09872000  | 5.75936769  |
| C | -2.01285047 | 0.88794667  | 6.39419432  |
| C | -2.11288427 | 3.68736439  | 4.08624419  |
| C | -1.50666625 | 3.15886701  | 5.20831183  |
| C | -3.75225126 | 2.87340410  | 1.28596739  |
| C | -4.51277430 | 2.00377760  | 0.46233970  |
| C | -4.84340516 | -1.32916540 | 0.18822950  |
| C | -4.27539703 | -2.45684630 | 0.86972497  |
| C | -2.63457866 | -3.80097459 | 3.46045057  |
| C | -1.94191237 | -3.51914212 | 4.62305380  |
| C | -0.79418009 | -1.07132506 | 6.58440774  |
| C | -0.70980119 | 0.28830564  | 6.70669712  |

Fig. 4 c)

frame 1

|   |             |             |             |
|---|-------------|-------------|-------------|
| H | -2.17762230 | 4.32954615  | -0.96074175 |
| H | 0.36765375  | 4.80183060  | -0.89712025 |
| H | -4.67652675 | 1.48079280  | -2.30919975 |
| H | -4.84269105 | -0.59408235 | -2.47265525 |
| H | -2.88471900 | -4.07919090 | -1.25989725 |
| H | -0.45213345 | -4.89388425 | -1.12981500 |
| H | 2.55576720  | -3.89322390 | -0.74746275 |
| H | 4.23955635  | -1.89202725 | -0.68336875 |
| H | 4.51584150  | 1.14359370  | -0.67591000 |
| H | 3.19181295  | 3.40192530  | -0.68565525 |
| H | -1.62859335 | 4.40399550  | 2.80085175  |
| H | -0.49882590 | 3.41635635  | 4.96620825  |
| H | -2.86346895 | 3.39817425  | 0.33859600  |
| H | -5.30473335 | 2.56825365  | -0.65512550 |
| H | -5.82174975 | -1.64067270 | -0.94582375 |
| H | -3.69328665 | -3.18275505 | -0.17256750 |
| H | -2.30007720 | -4.45257645 | 2.07820125  |
| H | -0.98877795 | -3.93360510 | 4.29990475  |
| H | 0.03186660  | -1.76178285 | 6.10793625  |
| H | 0.19932285  | 0.85722300  | 6.34676450  |
| C | 1.12073445  | 0.64946745  | -3.76865425 |
| C | -0.20381100 | 1.18980000  | -3.71661075 |
| C | -1.13048310 | 0.11239215  | -3.67131625 |
| C | -0.38921550 | -1.09730205 | -3.74941800 |
| C | 1.00426890  | -0.77412150 | -3.78334400 |
| C | -0.45457455 | 2.28279795  | -2.93646150 |
| C | -1.71294585 | 2.49809685  | -2.25377875 |
| C | -2.62190220 | 1.42067025  | -2.19319800 |
| C | -2.24436060 | 0.18601050  | -2.84457850 |
| C | -2.83773495 | -1.00119450 | -2.26452175 |
| C | -2.12107695 | -2.21396730 | -2.37123550 |
| C | -0.82223130 | -2.16376410 | -3.01586500 |
| C | 0.09758850  | -3.09999540 | -2.40567600 |
| C | 1.45889775  | -2.75283330 | -2.37205775 |
| C | 1.87568370  | -1.53146760 | -3.03590150 |
| C | 2.99289990  | -0.94691205 | -2.32738675 |
| C | 3.11339070  | 0.45580740  | -2.31813125 |
| C | 2.10717915  | 1.23403350  | -3.00970775 |
| C | 0.60700890  | 3.03820815  | -2.30630525 |
| C | 1.89994245  | 2.48904675  | -2.31205650 |
| C | -1.44014280 | 3.71399385  | -1.46604975 |
| C | -0.09605160 | 3.99706470  | -1.46471125 |
| C | -3.97257015 | 1.14011175  | -1.53038125 |
| C | -4.14063930 | -0.49973595 | -1.62638150 |
| C | -2.05617675 | -3.51561855 | -1.67406825 |
| C | -0.76629615 | -3.98911395 | -1.64710225 |
| C | 2.52446985  | -3.03388710 | -1.41547325 |
| C | 3.40958010  | -1.98088710 | -1.38253225 |
| C | 3.70546290  | 1.38610620  | -1.36175525 |
| C | 3.00850695  | 2.57185140  | -1.36534775 |

|   |             |             |             |
|---|-------------|-------------|-------------|
| C | -4.16844570 | -0.07235640 | 5.05260000  |
| C | -4.48588635 | 1.14154725  | 4.39229725  |
| C | -5.28548850 | 0.86369235  | 3.21574650  |
| C | -5.40699075 | -0.55220130 | 3.12240725  |
| C | -4.65738975 | -1.11794640 | 4.23008600  |
| C | -3.54990705 | 2.16036030  | 4.36368375  |
| C | -3.34385370 | 3.00946755  | 3.22570300  |
| C | -4.04413335 | 2.65268865  | 2.00587775  |
| C | -5.04820620 | 1.58824980  | 2.06515075  |
| C | -5.16688470 | 0.99189750  | 0.77172750  |
| C | -5.31282075 | -0.36840885 | 0.68220400  |
| C | -5.30253300 | -1.14145530 | 1.88367550  |
| C | -4.52174190 | -2.35793055 | 1.65539175  |
| C | -3.82085460 | -2.94679440 | 2.78055125  |
| C | -3.87353235 | -2.24185515 | 4.02861500  |
| C | -2.63404455 | -2.45622420 | 4.76187850  |
| C | -2.17021425 | -1.41863910 | 5.59650700  |
| C | -2.93238945 | -0.20854425 | 5.69989450  |
| C | -2.32528110 | 2.10083055  | 5.14728950  |
| C | -2.02177350 | 0.89281590  | 5.80523050  |
| C | -2.08552920 | 3.66384225  | 3.45593725  |
| C | -1.48251690 | 3.13527645  | 4.59426900  |
| C | -3.68026230 | 2.77484205  | 0.67777800  |
| C | -4.51820835 | 1.89669870  | -0.25025625 |
| C | -4.89850395 | -1.25061795 | -0.46709150 |
| C | -4.28677695 | -2.41557495 | 0.29662900  |
| C | -2.64758355 | -3.77432955 | 2.85640825  |
| C | -1.94655570 | -3.49346700 | 4.02693050  |
| C | -0.79068600 | -1.05805680 | 5.99307475  |
| C | -0.70365435 | 0.29471820  | 6.11525000  |

Fig. 4 d)

80

frame 1

|   |             |             |             |
|---|-------------|-------------|-------------|
| H | -2.25406105 | 4.39495589  | -1.29908248 |
| H | 0.26069784  | 4.50280498  | -0.59329325 |
| H | -4.78685592 | 1.51980397  | -2.31612206 |
| H | -4.98190791 | -0.64077799 | -2.40363788 |
| H | -2.98423232 | -4.01763982 | -1.55763475 |
| H | -0.54525703 | -4.52479929 | -0.74491013 |
| H | 2.47457059  | -3.82905106 | -0.60769802 |
| H | 4.25528964  | -1.89205818 | -0.63405452 |
| H | 4.52880297  | 1.11111818  | -0.61404859 |
| H | 3.12107136  | 3.33379404  | -0.53624121 |
| H | -0.41378773 | 4.51546283  | 1.80828469  |
| H | 1.31997899  | 3.50773732  | 3.50940785  |
| H | -3.30063986 | 4.01645342  | 0.01437276  |
| H | -5.12061790 | 2.45089801  | -0.41512332 |
| H | -5.50624957 | -1.63667297 | -0.57027921 |
| H | -4.07728358 | -3.53561116 | -0.25219612 |
| H | -1.21857402 | -4.65856428 | 1.42568040  |

|   |             |             |             |
|---|-------------|-------------|-------------|
| H | 0.66114032  | -4.08770400 | 3.16980093  |
| H | 2.19258658  | -1.77105112 | 4.34563931  |
| H | 2.42790267  | 0.84804203  | 4.46725269  |
| C | 1.14350141  | 0.64449542  | -3.75521450 |
| C | -0.17793587 | 1.19337181  | -3.78241216 |
| C | -1.12309469 | 0.12657816  | -3.85359243 |
| C | -0.37413451 | -1.08662749 | -3.82085161 |
| C | 1.02157131  | -0.76781621 | -3.77068319 |
| C | -0.46196386 | 2.25734118  | -2.96650514 |
| C | -1.76400329 | 2.47267188  | -2.39395670 |
| C | -2.68909931 | 1.42926446  | -2.46150642 |
| C | -2.30962891 | 0.21653456  | -3.13368176 |
| C | -2.90361441 | -0.93866646 | -2.52268738 |
| C | -2.17394954 | -2.12674134 | -2.49275734 |
| C | -0.84681777 | -2.11427160 | -3.04343729 |
| C | 0.02520460  | -2.96619560 | -2.25366192 |
| C | 1.41073945  | -2.68470883 | -2.25243351 |
| C | 1.86447669  | -1.52945170 | -2.97618357 |
| C | 2.99186714  | -0.94990803 | -2.27085082 |
| C | 3.11579565  | 0.44466005  | -2.26129855 |
| C | 2.10979841  | 1.22785205  | -2.95139726 |
| C | 0.55150961  | 2.92544958  | -2.16978090 |
| C | 1.86645333  | 2.42512959  | -2.19559292 |
| C | -1.54804073 | 3.60106955  | -1.47370138 |
| C | -0.18114964 | 3.78579671  | -1.28279839 |
| C | -3.95601419 | 1.16175334  | -1.68661517 |
| C | -4.11184408 | -0.49008768 | -1.74365409 |
| C | -2.18034311 | -3.30003692 | -1.59905969 |
| C | -0.85026131 | -3.71586129 | -1.40534904 |
| C | 2.46511950  | -2.97475825 | -1.28240028 |
| C | 3.39617084  | -1.96731509 | -1.29699909 |
| C | 3.69414034  | 1.35215092  | -1.26898023 |
| C | 2.95990902  | 2.50814236  | -1.22655265 |
| C | -2.10609267 | -0.08343447 | 4.63274001  |
| C | -2.60747995 | 1.13232667  | 4.09195468  |
| C | -3.66894168 | 0.82590766  | 3.17888666  |
| C | -3.79246343 | -0.58860013 | 3.12165043  |
| C | -2.80862887 | -1.14684864 | 3.99885214  |
| C | -1.74003038 | 2.16064130  | 3.77991214  |
| C | -1.90103133 | 3.02844915  | 2.63611021  |
| C | -2.91663855 | 2.67655225  | 1.68076609  |
| C | -3.74184974 | 1.52913809  | 1.99903868  |
| C | -4.26284360 | 0.94363713  | 0.81951065  |
| C | -4.38783636 | -0.41833060 | 0.76646094  |
| C | -3.98947963 | -1.18109065 | 1.89262842  |
| C | -3.37393769 | -2.42321899 | 1.47714599  |
| C | -2.43637220 | -3.01174096 | 2.38332932  |
| C | -2.13133316 | -2.27821794 | 3.59385609  |
| C | -0.74380321 | -2.49714717 | 3.95733754  |
| C | -0.04833476 | -1.43607539 | 4.57065756  |
| C | -0.74074296 | -0.20998648 | 4.86005268  |

|   |             |             |             |
|---|-------------|-------------|-------------|
| C | -0.33924094 | 2.11088747  | 4.15783264  |
| C | 0.15981384  | 0.89841509  | 4.67388520  |
| C | -0.63569742 | 3.72767361  | 2.52534105  |
| C | 0.28078855  | 3.19587742  | 3.41725229  |
| C | -3.22687121 | 2.98709547  | 0.32748834  |
| C | -4.15892812 | 1.91720513  | -0.30291962 |
| C | -4.46348262 | -1.30026871 | -0.42920055 |
| C | -3.72946687 | -2.57080852 | 0.09061074  |
| C | -1.30254050 | -3.89959705 | 2.20041049  |
| C | -0.31094261 | -3.59958629 | 3.11934761  |
| C | 1.37655502  | -1.06787293 | 4.50010528  |
| C | 1.49898330  | 0.29012077  | 4.56472833  |

Fig. 4 e)

80

frame 40

|   |             |             |             |
|---|-------------|-------------|-------------|
| H | -2.13718095 | 4.37006715  | -1.61408275 |
| H | 0.25927740  | 4.24075605  | -0.41588475 |
| H | -4.82610270 | 1.53945750  | -2.11052700 |
| H | -5.02437960 | -0.66558210 | -2.15983300 |
| H | -2.86919760 | -3.95801565 | -1.78808925 |
| H | -0.49839600 | -4.27520595 | -0.56626775 |
| H | 2.44269045  | -3.79348575 | -0.58392525 |
| H | 4.25610480  | -1.87673340 | -0.63548950 |
| H | 4.52989710  | 1.10075775  | -0.60917925 |
| H | 3.07567110  | 3.30024450  | -0.49769675 |
| H | 0.39550215  | 4.68779205  | 1.30076000  |
| H | 2.41199415  | 3.58617060  | 2.52205725  |
| H | -3.20098050 | 3.96549780  | 0.19465425  |
| H | -4.72402290 | 2.42947620  | -0.10378400 |
| H | -5.09836395 | -1.64221530 | -0.19064175 |
| H | -3.88258125 | -3.44692485 | 0.02955600  |
| H | -0.50165685 | -4.86984795 | 1.11661250  |
| H | 1.67678655  | -4.21785015 | 2.38613600  |
| H | 3.46084725  | -1.77985155 | 3.14829400  |
| H | 3.70794600  | 0.82993740  | 3.18727825  |
| C | 1.09446270  | 0.64275540  | -3.76125350 |
| C | -0.22912800 | 1.20830490  | -3.82135475 |
| C | -1.17693855 | 0.14126640  | -3.93472475 |
| C | -0.42996780 | -1.07436840 | -3.84871325 |
| C | 0.96935790  | -0.74792415 | -3.77604975 |
| C | -0.52752675 | 2.25770730  | -2.97255800 |
| C | -1.80947970 | 2.40597315  | -2.37649900 |
| C | -2.74460475 | 1.41015060  | -2.53388250 |
| C | -2.38930185 | 0.23227515  | -3.25230875 |
| C | -2.94995610 | -0.89315385 | -2.57992800 |
| C | -2.20641615 | -2.04348180 | -2.46036500 |
| C | -0.90954300 | -2.08777470 | -3.04136400 |
| C | -0.03550500 | -2.92730610 | -2.21854750 |
| C | 1.39045290  | -2.65491330 | -2.25443500 |
| C | 1.82113380  | -1.52827740 | -2.97079650 |



|   |             |             |             |
|---|-------------|-------------|-------------|
| C | 2.96245725  | -0.93743970 | -2.26336475 |
| C | 3.09088935  | 0.44258145  | -2.25235250 |
| C | 2.07083805  | 1.24119450  | -2.94002800 |
| C | 0.47868315  | 2.90708070  | -2.12942500 |
| C | 1.83861645  | 2.40278325  | -2.18813725 |
| C | -1.71625065 | 3.40824720  | -1.25239750 |
| C | -0.20896995 | 3.60596250  | -1.15548875 |
| C | -3.91178745 | 1.15414500  | -1.63090400 |
| C | -4.05876900 | -0.47220960 | -1.66547925 |
| C | -2.29878960 | -3.09723885 | -1.38147600 |
| C | -0.84591345 | -3.54473340 | -1.28361900 |
| C | 2.44443630  | -2.93976945 | -1.25986925 |
| C | 3.38165820  | -1.94803320 | -1.27813675 |
| C | 3.67755105  | 1.33709610  | -1.24163175 |
| C | 2.92767330  | 2.47585140  | -1.19310425 |
| C | -0.71960970 | -0.08322405 | 4.16005850  |
| C | -1.32511065 | 1.13644050  | 3.72930500  |
| C | -2.52664740 | 0.83076870  | 3.03050075  |
| C | -2.65808850 | -0.59850720 | 3.00018450  |
| C | -1.53848475 | -1.15025610 | 3.68275450  |
| C | -0.52639455 | 2.14769865  | 3.25405375  |
| C | -0.90505410 | 3.01593075  | 2.14925150  |
| C | -2.04619680 | 2.66588580  | 1.40326875  |
| C | -2.83377240 | 1.56025395  | 1.89128000  |
| C | -3.57565425 | 0.93845190  | 0.84804450  |
| C | -3.70130175 | -0.42930570 | 0.81951550  |
| C | -3.09275445 | -1.21688340 | 1.83545650  |
| C | -2.52425115 | -2.43359355 | 1.30309200  |
| C | -1.46831505 | -3.01536885 | 2.02851525  |
| C | -0.94117470 | -2.27371290 | 3.16511175  |
| C | 0.48256665  | -2.50779180 | 3.28430075  |
| C | 1.29109755  | -1.45201065 | 3.73864700  |
| C | 0.65112585  | -0.21160875 | 4.11282500  |
| C | 0.91780395  | 2.09957025  | 3.36374100  |
| C | 1.51347270  | 0.89678055  | 3.77516450  |
| C | 0.32325120  | 3.78905220  | 1.90557325  |
| C | 1.38213270  | 3.23829540  | 2.58087175  |
| C | -2.62583595 | 3.04396815  | 0.00936400  |
| C | -3.77198280 | 1.89792285  | -0.27079275 |
| C | -4.06335735 | -1.28988240 | -0.33797300 |
| C | -3.14702535 | -2.63851170 | -0.10799400 |
| C | -0.40635120 | -3.99900000 | 1.75812350  |
| C | 0.73021935  | -3.68521005 | 2.45912700  |
| C | 2.67780705  | -1.08302670 | 3.44380100  |
| C | 2.80728855  | 0.28288890  | 3.46167025  |

Fig. 4 f)

80

frame 1

|   |             |            |             |
|---|-------------|------------|-------------|
| H | -2.11064967 | 4.39196696 | -1.65858811 |
| H | 0.16053038  | 4.70519178 | -0.90812518 |

|   |             |             |             |
|---|-------------|-------------|-------------|
| H | -4.79410466 | 1.53626363  | -2.11476990 |
| H | -4.99123344 | -0.67181415 | -2.14894539 |
| H | -2.83284616 | -3.96496899 | -1.77521940 |
| H | -0.65431088 | -4.67999976 | -1.04209859 |
| H | 2.67462357  | -3.90238254 | -0.77290764 |
| H | 4.42605335  | -1.94314019 | -0.86617367 |
| H | 4.70038851  | 1.18404778  | -0.85009190 |
| H | 3.30601450  | 3.41188176  | -0.72332555 |
| H | 0.33463680  | 4.84390664  | 0.98815080  |
| H | 2.58167302  | 3.57770240  | 1.48502450  |
| H | -3.23711852 | 4.00121562  | 0.16413998  |
| H | -4.73967804 | 2.40183149  | -0.07391905 |
| H | -5.09999473 | -1.59051178 | -0.13225214 |
| H | -3.90582938 | -3.44143609 | 0.04715595  |
| H | -0.56155979 | -4.93594186 | 0.85618327  |
| H | 1.87433102  | -4.12645667 | 1.39941701  |
| H | 3.83640359  | -1.75363112 | 2.12797483  |
| H | 4.08020095  | 0.87496253  | 2.15227230  |
| C | 1.12613458  | 0.65544359  | -3.72922007 |
| C | -0.18919988 | 1.20636752  | -3.77097547 |
| C | -1.13091671 | 0.12644004  | -3.87557950 |
| C | -0.38240447 | -1.09518203 | -3.78914780 |
| C | 1.00558975  | -0.77195645 | -3.73830622 |
| C | -0.46773253 | 2.24986169  | -2.89566912 |
| C | -1.76253831 | 2.40056916  | -2.32353329 |
| C | -2.70024465 | 1.40900692  | -2.49095652 |
| C | -2.33920321 | 0.22042604  | -3.19816668 |
| C | -2.90508179 | -0.90491059 | -2.52181811 |
| C | -2.14824288 | -2.04336258 | -2.37665861 |
| C | -0.83954215 | -2.09179385 | -2.93538629 |
| C | 0.03912520  | -2.91638287 | -2.12340363 |
| C | 1.43604647  | -2.69305515 | -2.22593106 |
| C | 1.86224375  | -1.51813447 | -2.96798350 |
| C | 3.03414381  | -0.94767352 | -2.34100621 |
| C | 3.15896979  | 0.46401876  | -2.33621640 |
| C | 2.09963720  | 1.23443541  | -2.95307264 |
| C | 0.54102298  | 2.89971430  | -2.07469768 |
| C | 1.88222398  | 2.45167764  | -2.19147700 |
| C | -1.70782079 | 3.44768069  | -1.24745303 |
| C | -0.17824568 | 3.69169929  | -1.08253389 |
| C | -3.88937370 | 1.15612326  | -1.61394557 |
| C | -4.03663863 | -0.47172665 | -1.63701541 |
| C | -2.28212683 | -3.11445286 | -1.33200678 |
| C | -0.81417684 | -3.61607292 | -1.16359732 |
| C | 2.56890415  | -3.00707570 | -1.37921983 |
| C | 3.50419917  | -1.98435908 | -1.44446183 |
| C | 3.79934660  | 1.39112436  | -1.42580784 |
| C | 3.05059292  | 2.55544814  | -1.34157337 |
| C | -0.17939544 | -0.07631798 | 3.63520969  |
| C | -0.86334045 | 1.15113172  | 3.36895743  |
| C | -2.17164621 | 0.83921144  | 2.90370849  |

|   |             |             |             |
|---|-------------|-------------|-------------|
| C | -2.30111560 | -0.59321871 | 2.88375280  |
| C | -1.07412380 | -1.15181965 | 3.34012181  |
| C | -0.15435220 | 2.16431875  | 2.76160538  |
| C | -0.73928540 | 3.02971062  | 1.77707990  |
| C | -1.99111481 | 2.69879152  | 1.27516538  |
| C | -2.68145109 | 1.57708870  | 1.84044228  |
| C | -3.50947224 | 0.95463423  | 0.86212364  |
| C | -3.63433373 | -0.41307259 | 0.84434989  |
| C | -2.93485588 | -1.19997452 | 1.80501360  |
| C | -2.46030033 | -2.41444881 | 1.21059729  |
| C | -1.29087709 | -2.98286338 | 1.69998277  |
| C | -0.56005832 | -2.26136210 | 2.70425034  |
| C | 0.86947650  | -2.48034314 | 2.52979808  |
| C | 1.76379706  | -1.43310564 | 2.92438898  |
| C | 1.16325272  | -0.19508761 | 3.37141681  |
| C | 1.29155579  | 2.12393539  | 2.58494111  |
| C | 1.97926161  | 0.92465478  | 2.95085950  |
| C | 0.38558119  | 3.77800546  | 1.19349587  |
| C | 1.58481194  | 3.20580092  | 1.70927869  |
| C | -2.65561575 | 3.08689317  | -0.03196057 |
| C | -3.77213786 | 1.90723362  | -0.25923036 |
| C | -4.05889458 | -1.27153958 | -0.30353668 |
| C | -3.17337484 | -2.63491211 | -0.11130647 |
| C | -0.31740859 | -3.90185737 | 1.08859620  |
| C | 0.96379306  | -3.57746130 | 1.62873597  |
| C | 3.07984336  | -1.06167746 | 2.49253714  |
| C | 3.20746065  | 0.33092561  | 2.50577979  |

Fig. 4 g)

80

frame 312

|   |             |             |             |
|---|-------------|-------------|-------------|
| H | -2.10462210 | 4.40861040  | -1.70266575 |
| H | 0.03805140  | 4.82579910  | -1.34984775 |
| H | -4.75998060 | 1.53538365  | -2.09669650 |
| H | -4.95088815 | -0.68297235 | -2.11770000 |
| H | -2.82210000 | -3.96703845 | -1.76894825 |
| H | -0.77868165 | -4.74459990 | -1.43715700 |
| H | 2.93534280  | -3.99600270 | -1.03651475 |
| H | 4.62204990  | -2.00915775 | -1.10395775 |
| H | 4.89687135  | 1.26155475  | -1.09614675 |
| H | 3.56177415  | 3.50437530  | -1.02575350 |
| H | 0.35190900  | 4.85323410  | 0.79981625  |
| H | 2.65535790  | 3.57184080  | 0.54256525  |
| H | -3.24987180 | 4.02158055  | 0.16314650  |
| H | -4.73317335 | 2.37261705  | -0.02433725 |
| H | -5.07901260 | -1.54313595 | -0.05901000 |
| H | -3.90450795 | -3.42932760 | 0.09497475  |
| H | -0.51544830 | -4.88782950 | 0.72388150  |
| H | 1.98061395  | -4.03877505 | 0.50026675  |
| H | 4.16150505  | -1.72615005 | 1.19463800  |
| H | 4.39736055  | 0.90037515  | 1.20475350  |

|   |             |             |             |
|---|-------------|-------------|-------------|
| C | 1.13952945  | 0.64793445  | -3.73287525 |
| C | -0.16662930 | 1.20141000  | -3.73810700 |
| C | -1.10422710 | 0.11618610  | -3.82519175 |
| C | -0.35629635 | -1.10681880 | -3.74437100 |
| C | 1.02197790  | -0.77197800 | -3.73465750 |
| C | -0.42001605 | 2.26143870  | -2.86533775 |
| C | -1.71688635 | 2.40448650  | -2.28704050 |
| C | -2.65554825 | 1.40895645  | -2.44030350 |
| C | -2.29279455 | 0.21147540  | -3.12872850 |
| C | -2.85359490 | -0.91434300 | -2.45416325 |
| C | -2.09254650 | -2.05156440 | -2.31135275 |
| C | -0.78466170 | -2.11525995 | -2.87936475 |
| C | 0.11282580  | -2.91573840 | -2.08515000 |
| C | 1.49638710  | -2.67941235 | -2.22672225 |
| C | 1.89349710  | -1.50934425 | -2.97445450 |
| C | 3.09059700  | -0.93591915 | -2.39447375 |
| C | 3.21019845  | 0.46400820  | -2.39526775 |
| C | 2.12542545  | 1.22935110  | -2.97504600 |
| C | 0.60217275  | 2.89655235  | -2.06976650 |
| C | 1.92875730  | 2.44573485  | -2.22249100 |
| C | -1.70576085 | 3.48382290  | -1.25288875 |
| C | -0.10534920 | 3.78389760  | -1.02216550 |
| C | -3.86313930 | 1.15557315  | -1.58034950 |
| C | -4.00467795 | -0.47119125 | -1.59318375 |
| C | -2.27519160 | -3.13211310 | -1.29885425 |
| C | -0.74958540 | -3.70557285 | -1.07160400 |
| C | 2.73020070  | -3.03554880 | -1.49757700 |
| C | 3.64208595  | -2.01132315 | -1.57535825 |
| C | 3.93341895  | 1.43022285  | -1.57217400 |
| C | 3.20425200  | 2.59144020  | -1.49139725 |
| C | 0.31417305  | -0.07030110 | 3.08583350  |
| C | -0.40958820 | 1.16339700  | 2.97726450  |
| C | -1.77928440 | 0.84304560  | 2.74208025  |
| C | -1.90760280 | -0.58923825 | 2.73157225  |
| C | -0.61836480 | -1.15277010 | 2.96035925  |
| C | 0.18914595  | 2.17413675  | 2.25127375  |
| C | -0.56606550 | 3.01141695  | 1.39621425  |
| C | -1.88808615 | 2.71272210  | 1.15676675  |
| C | -2.48247030 | 1.58499960  | 1.79304300  |
| C | -3.41272725 | 0.96771720  | 0.89852575  |
| C | -3.53926065 | -0.40025205 | 0.88931000  |
| C | -2.73321165 | -1.18329840 | 1.77560475  |
| C | -2.34520785 | -2.38855440 | 1.12262025  |
| C | -1.09512570 | -2.92000635 | 1.35316325  |
| C | -0.20503995 | -2.24261940 | 2.21826350  |
| C | 1.18517370  | -2.46880230 | 1.81172225  |
| C | 2.15616570  | -1.42639950 | 2.12436675  |
| C | 1.59174900  | -0.17961150 | 2.60913625  |
| C | 1.59504510  | 2.15661210  | 1.83763425  |
| C | 2.36771595  | 0.95376990  | 2.13548900  |

|   |             |             |             |
|---|-------------|-------------|-------------|
| C | 0.37067340  | 3.78434280  | 0.51244050  |
| C | 1.71574335  | 3.19424985  | 0.92090950  |
| C | -2.66022915 | 3.11825505  | -0.06257825 |
| C | -3.75359625 | 1.90953570  | -0.22523925 |
| C | -4.03331250 | -1.25282415 | -0.25045275 |
| C | -3.16875330 | -2.63371035 | -0.10612000 |
| C | -0.30208905 | -3.83376960 | 0.46174150  |
| C | 1.12452330  | -3.49939290 | 0.88146175  |
| C | 3.41674290  | -1.05308280 | 1.61264950  |
| C | 3.54498270  | 0.36721800  | 1.61950375  |

Fig. 4 h)

80

frame 1

|   |             |             |             |
|---|-------------|-------------|-------------|
| H | -2.15225380 | 4.42588465  | -1.73917182 |
| H | 0.00419630  | 4.88195644  | -1.47109952 |
| H | -4.75191584 | 1.53062313  | -2.03385830 |
| H | -4.93834393 | -0.68557828 | -2.04627043 |
| H | -2.87249415 | -3.98061483 | -1.78489849 |
| H | -0.82300836 | -4.80122754 | -1.52386718 |
| H | 2.84539761  | -4.09836822 | -1.17888186 |
| H | 4.48137424  | -2.06200134 | -0.98725982 |
| H | 4.75267142  | 1.30346057  | -0.95804041 |
| H | 3.48511273  | 3.58128972  | -1.16106180 |
| H | 0.51139455  | 4.83333536  | 0.66841379  |
| H | 2.73232064  | 3.87390470  | 0.66883596  |
| H | -3.18224478 | 4.01568981  | 0.19351279  |
| H | -4.65949348 | 2.35745789  | 0.03617810  |
| H | -4.99470508 | -1.52931972 | 0.01862532  |
| H | -3.82492648 | -3.42205370 | 0.15246559  |
| H | -0.35601602 | -4.88311392 | 0.62216214  |
| H | 2.03071181  | -4.29376401 | 0.58449260  |
| H | 4.37206318  | -1.73196714 | 0.98862278  |
| H | 4.60588283  | 0.89800507  | 0.99422444  |
| C | 1.12649641  | 0.64673457  | -3.72749566 |
| C | -0.18078589 | 1.20067679  | -3.78518380 |
| C | -1.11389279 | 0.11184426  | -3.85473309 |
| C | -0.37308168 | -1.11460384 | -3.79057624 |
| C | 1.00642040  | -0.77792955 | -3.73065480 |
| C | -0.46372967 | 2.28966374  | -2.95718737 |
| C | -1.74683303 | 2.42722564  | -2.35032187 |
| C | -2.66385470 | 1.40772821  | -2.45740091 |
| C | -2.30285748 | 0.20892473  | -3.14595545 |
| C | -2.85956839 | -0.91595796 | -2.46701842 |
| C | -2.12432518 | -2.07478052 | -2.36787427 |
| C | -0.83423876 | -2.14964767 | -2.97033931 |
| C | 0.04842687  | -2.97108554 | -2.19832268 |
| C | 1.41999072  | -2.70990058 | -2.25468661 |
| C | 1.85037187  | -1.51811841 | -2.93617345 |
| C | 3.00451866  | -0.95539655 | -2.25511604 |
| C | 3.11828866  | 0.47292335  | -2.23524981 |

|   |             |             |             |
|---|-------------|-------------|-------------|
| C | 2.07953413  | 1.22847933  | -2.91995365 |
| C | 0.54100923  | 2.93941414  | -2.17484162 |
| C | 1.84541313  | 2.45694377  | -2.21898632 |
| C | -1.71625751 | 3.50786668  | -1.31163309 |
| C | -0.11961304 | 3.83743703  | -1.14487542 |
| C | -3.83721616 | 1.15027170  | -1.55091845 |
| C | -3.97324108 | -0.47091441 | -1.55886020 |
| C | -2.28529553 | -3.15772930 | -1.34449166 |
| C | -0.76780852 | -3.75665100 | -1.17964307 |
| C | 2.54768254  | -3.07453228 | -1.38165828 |
| C | 3.48595259  | -2.01594879 | -1.41686262 |
| C | 3.75184990  | 1.41661417  | -1.36306070 |
| C | 2.98139470  | 2.62429515  | -1.28967322 |
| C | 0.54040533  | -0.07034686 | 2.93650359  |
| C | -0.17912407 | 1.15518127  | 2.83154158  |
| C | -1.56419029 | 0.84099303  | 2.67032927  |
| C | -1.69128649 | -0.59053678 | 2.66451730  |
| C | -0.38582227 | -1.14789055 | 2.82458715  |
| C | 0.39857210  | 2.15740246  | 2.05947413  |
| C | -0.40113374 | 2.99154039  | 1.23991974  |
| C | -1.74379816 | 2.70843890  | 1.08553858  |
| C | -2.31026900 | 1.58438056  | 1.75667451  |
| C | -3.29075241 | 0.96766201  | 0.91405399  |
| C | -3.40633317 | -0.40265691 | 0.90463925  |
| C | -2.55223043 | -1.18554994 | 1.74312666  |
| C | -2.19180972 | -2.38632231 | 1.06502172  |
| C | -0.92704726 | -2.90985932 | 1.22534556  |
| C | 0.00324885  | -2.23115917 | 2.04942842  |
| C | 1.36367143  | -2.43799563 | 1.57529837  |
| C | 2.32284887  | -1.41512095 | 1.85581287  |
| C | 1.79804853  | -0.18130949 | 2.40091985  |
| C | 1.76881339  | 2.11367444  | 1.57778519  |
| C | 2.52754273  | 0.94391922  | 1.85540980  |
| C | 0.48501952  | 3.78367328  | 0.32090419  |
| C | 1.90193955  | 3.17607770  | 0.58857568  |
| C | -2.59764586 | 3.12144268  | -0.07857804 |
| C | -3.68182834 | 1.90575179  | -0.19858873 |
| C | -3.95376948 | -1.25200358 | -0.21436021 |
| C | -3.09529156 | -2.63736371 | -0.10675305 |
| C | -0.18741629 | -3.83804188 | 0.30321381  |
| C | 1.29278060  | -3.49946155 | 0.60895374  |
| C | 3.59625356  | -1.04196157 | 1.29894026  |
| C | 3.71857897  | 0.35397877  | 1.29462421  |

Fig. 4 i)

80

frame 290

|   |             |             |             |
|---|-------------|-------------|-------------|
| H | -2.17723665 | 4.43297490  | -1.77817600 |
| H | -0.01064730 | 4.93521180  | -1.62177025 |
| H | -4.69078350 | 1.53489585  | -1.95191950 |
| H | -4.88228430 | -0.68562900 | -1.95939975 |

|   |             |             |             |
|---|-------------|-------------|-------------|
| H | -2.90902110 | -3.97365975 | -1.80508675 |
| H | -0.86062335 | -4.84258140 | -1.65215125 |
| H | 2.86407510  | -3.98389770 | -1.38375600 |
| H | 4.32871050  | -2.30380755 | -1.28240550 |
| H | 4.66264815  | 1.52422290  | -1.26666800 |
| H | 3.51637155  | 3.43323825  | -1.35924500 |
| H | 0.67844250  | 4.86556350  | 0.49666000  |
| H | 2.72673360  | 3.99469680  | 0.64777350  |
| H | -3.05143860 | 4.00530855  | 0.22463000  |
| H | -4.51432245 | 2.32610760  | 0.12280675  |
| H | -4.84806255 | -1.50403575 | 0.11099800  |
| H | -3.69801750 | -3.41375880 | 0.20366250  |
| H | -0.17575095 | -4.90593645 | 0.46752825  |
| H | 1.99176855  | -4.40736900 | 0.61830400  |
| H | 4.50817335  | -1.51753500 | 0.79431175  |
| H | 4.69785120  | 0.70423575  | 0.80278350  |
| C | 1.18691040  | 0.63121260  | -3.72709775 |
| C | -0.12802050 | 1.18980000  | -3.82233375 |
| C | -1.06389345 | 0.10857675  | -3.88115525 |
| C | -0.33001455 | -1.11788280 | -3.82632225 |
| C | 1.06111410  | -0.79540515 | -3.72984200 |
| C | -0.44525055 | 2.30692140  | -3.04518025 |
| C | -1.72008405 | 2.44600860  | -2.41901775 |
| C | -2.62210200 | 1.40718570  | -2.47940400 |
| C | -2.25970530 | 0.20944935  | -3.16465450 |
| C | -2.82367185 | -0.91142040 | -2.48663800 |
| C | -2.11587870 | -2.08975515 | -2.43197300 |
| C | -0.83565900 | -2.16769365 | -3.05639475 |
| C | 0.02085735  | -2.99973870 | -2.27665075 |
| C | 1.35992130  | -2.69073225 | -2.18312575 |
| C | 1.86671070  | -1.54451490 | -2.86742750 |
| C | 2.88936390  | -0.93542970 | -2.07909625 |
| C | 3.00762240  | 0.43728825  | -2.07450550 |
| C | 2.10720765  | 1.22184840  | -2.85781700 |
| C | 0.54348615  | 2.97204090  | -2.25911475 |
| C | 1.80702540  | 2.43290520  | -2.16510125 |
| C | -1.68592140 | 3.53153970  | -1.37660950 |
| C | -0.10747260 | 3.89747040  | -1.26380075 |
| C | -3.75426195 | 1.14757680  | -1.51785400 |
| C | -3.89353830 | -0.46733880 | -1.52310750 |
| C | -2.27003100 | -3.17361750 | -1.39694850 |
| C | -0.77852955 | -3.80566455 | -1.28736150 |
| C | 2.28764010  | -3.09872670 | -1.06860000 |
| C | 3.35426505  | -1.87605570 | -0.99493225 |
| C | 3.62816595  | 1.27011690  | -0.98315700 |
| C | 2.79374250  | 2.66117925  | -1.04829650 |
| C | 0.88009245  | -0.08406270 | 2.72508800  |
| C | 0.14670195  | 1.14263295  | 2.66999125  |
| C | -1.24527435 | 0.82420995  | 2.57246750  |
| C | -1.37208915 | -0.60180180 | 2.56921975  |
| C | -0.05772705 | -1.16112180 | 2.66381000  |

|   |             |             |             |
|---|-------------|-------------|-------------|
| C | 0.65213295  | 2.18993880  | 1.89780350  |
| C | -0.20482005 | 3.02159205  | 1.11783400  |
| C | -1.54479795 | 2.71624065  | 1.02461825  |
| C | -2.05285170 | 1.57251720  | 1.71117025  |
| C | -3.07544370 | 0.95947605  | 0.92460275  |
| C | -3.19470120 | -0.41260860 | 0.92016575  |
| C | -2.29262655 | -1.19565300 | 1.70221900  |
| C | -1.99159440 | -2.40485805 | 1.00715075  |
| C | -0.72688800 | -2.93900205 | 1.09780550  |
| C | 0.26019570  | -2.27690880 | 1.88634375  |
| C | 1.53566580  | -2.42242200 | 1.26375025  |
| C | 2.44024350  | -1.38718500 | 1.32672000  |
| C | 2.07669930  | -0.18797715 | 2.01042775  |
| C | 1.93202535  | 2.11158630  | 1.27275300  |
| C | 2.63908005  | 0.93210660  | 1.32929150  |
| C | 0.59453955  | 3.83002260  | 0.12906900  |
| C | 2.08655175  | 3.19614750  | 0.23894675  |
| C | -2.47328505 | 3.12118710  | -0.09063075 |
| C | -3.54009405 | 1.89599160  | -0.16225675 |
| C | -3.81372810 | -1.24828665 | -0.17207825 |
| C | -2.97781080 | -2.63954505 | -0.10779225 |
| C | -0.07765320 | -3.86947110 | 0.10581300  |
| C | 1.50012525  | -3.50528460 | 0.21852125  |
| C | 3.57065850  | -1.13036835 | 0.36267575  |
| C | 3.70907505  | 0.48589650  | 0.36691675  |
